# Supplementary material for: Antibiotic Susceptibility, Virulence Pattern, and Typing of Staphylococcus aureus Strains Isolated From Variety of Infections in India
Source: PubMed Central journal article supplement (PMC6904308; doi:10.3389/fmicb.2019.02763), 2019-12-04
Supplement: Data_Sheet_1.pdf [file Data_Sheet_1.pdf]

**SUPPLEMENTAL MATERIAL**

TABLE S1. Virulence gene profiles and *agr* types among methicillin-resistant and –sensitive isolates of *Staphylococcus aureus*.

| <i>agr</i> type                | Toxin gene profile                 | No. (%) of MRSA            | No. (%) of MSSA |
|--------------------------------|------------------------------------|----------------------------|-----------------|
| I                              | <i>sei-cna-hla-hlg-efb</i>         | 3 (9.6%)                   | 3 (3.8%)        |
|                                | <i>sea-sei-cna-hla-hlg-efb</i>     | 4 (12.9%)                  | 1 (1.2%)        |
|                                | <i>sei-cna-hlg-efb</i>             | 1 (3.2%)                   | 0               |
|                                | <i>cna-hla-hlg</i>                 | 0                          | 1 (1.2%)        |
|                                | <i>hla-hlg-efb</i>                 | 1 (3.2%)                   | 0               |
|                                | <i>sec-sei-cna-hla-hlg</i>         | 1 (3.2%)                   | 0               |
|                                | <i>hlg</i>                         | 0                          | 1 (1.2%)        |
|                                | <i>sea-cna-hla</i>                 | 1 (3.2%)                   | 0               |
|                                | <i>sea-cna-hla-hlg-efb</i>         | 2 (6.4%)                   | 0               |
|                                | <i>sea-hla-hlg-efb</i>             | 1 (3.2%)                   | 0               |
|                                | <i>sec-sei-cna-hla-hlg-efb</i>     | 1 (3.2%)                   | 0               |
|                                | <i>sei-hla-hlg-efb</i>             | 1 (3.2%)                   | 7 (9%)          |
|                                | <i>sei-hla-hlg</i>                 | 0                          | 2 (2.5%)        |
|                                | <i>sei-cna-hla-hlg</i>             | 3 (9.6%)                   | 4 (5.1%)        |
|                                | <i>sea-sec-sei-cna-hla-hlg-efb</i> | 1 (3.2%)                   | 0               |
|                                | <i>sea-sei-hla-hlg-efb</i>         | 0                          | 1 (1.2%)        |
| II                             | <i>sec-cna-hla-hlg-efb</i>         | 0                          | 1 (1.2%)        |
|                                | <i>sec-sei-cna-hla-hlg-efb</i>     | 2 (6.4%)                   | 0               |
|                                | <i>sea-sei-cna-hla-hlg-efb</i>     | 1 (3.2%)                   | 1 (1.2%)        |
|                                | <i>sea-sec-sei-cna-hla-hlg-efb</i> | 1 (3.2%)                   | 0               |
|                                | <i>sei-cna-hla-hlg-efb</i>         | 0                          | 1 (1.2%)        |
|                                | <i>sei-hla-efb</i>                 | 0                          | 1 (1.2%)        |
|                                | <i>sei-hlg-efb</i>                 | 0                          | 1 (1.2%)        |
|                                | <i>sei-hlg</i>                     | 0                          | 1 (1.2%)        |
|                                | <i>sei-hla-hlg-efb</i>             | 1 (3.2%)                   | 7 (9%)          |
|                                | III                                | <i>sei-cna-hla-hlg-efb</i> | 1 (3.2%)        |
| <i>hla-hlg-efb</i>             |                                    | 0                          | 1 (1.2%)        |
| <i>sea-cna-hla-hlg</i>         |                                    | 0                          | 1 (1.2%)        |
| <i>sea-sei-cna-hla-hlg-efb</i> |                                    | 0                          | 6 (7.7%)        |

|    |                                    |          |          |
|----|------------------------------------|----------|----------|
|    | <i>sea-sei-cna-hlg-efb</i>         | 0        | 2 (1.2%) |
|    | <i>sea-sec-sei-cna-hla-hlg-efb</i> | 1 (3.2%) | 0        |
|    | <i>sei-hla-hlg-efb</i>             | 0        | 2 (2.5%) |
|    | <i>sea-sec-sei-cna-hla-hlg</i>     | 0        | 1 (1.2%) |
|    | <i>sea-sec-sei-hla-hlg-efb</i>     | 0        | 1 (1.2%) |
|    | <i>sea-sei-cna-hla-hlg</i>         | 0        | 0        |
|    | <i>sei-cna-hla-hlg</i>             | 1 (3.2%) | 3 (3.8%) |
|    | <i>sei-cna-hlg-efb</i>             | 0        | 2 (2.5%) |
|    | <i>sei-hla-hlg</i>                 | 0        | 1 (1.2%) |
|    | <i>sea-sei-hla-hlg-efb</i>         | 0        | 1 (1.2%) |
|    | <i>sea-cna-hla-hlg-efb</i>         | 0        | 1 (1.2%) |
| IV | <i>sei-cna-hla-hlg-efb</i>         | 0        | 3 (3.8%) |
|    | <i>cna-hla-hlg</i>                 | 0        | 1 (1.2%) |
|    | <i>sei-cna-hla-hlg</i>             | 0        | 2 (2.5%) |
|    | <i>cna-hla-hlg-efb</i>             | 0        | 1 (1.2%) |
| NT | <i>sea-sec-sei-cna-hla-hlg-efb</i> | 3 (9.6%) | 1 (1.2%) |
|    | <i>sei-hla-hlg-efb</i>             | 0        | 1 (1.2%) |
|    | <i>sea-sei-cna-hla-hlg-efb</i>     | 1 (3.2%) | 1 (1.2%) |
|    | <i>sei-cna-hla-hlg</i>             | 0        | 1 (1.2%) |
|    | <i>cna-hla-hlg</i>                 | 0        | 1 (1.2%) |
|    | <i>sei-cna-hla-hlg-efb</i>         | 0        | 4 (5.1%) |

NT: Non-typable

TABLE S2. Clonal Complex, Sequence types and spa-types of methicillin-resistant and methicillin-sensitive *Staphylococcus aureus* isolates.

| Clonal Complex | ST     | spa type | No. (%) of MRSA | No. (%) of MSSA |
|----------------|--------|----------|-----------------|-----------------|
| CC30           | ST30   | t012     | 1 (3.2%)        | 0               |
|                | ST503  | t012     | 1 (3.2%)        | 0               |
|                | ST714  | t021     | 0               | 1 (1.2%)        |
|                | ST938  | t021     | 0               | 2 (2.5%)        |
|                | ST1482 | t386     | 0               | 1 (1.2%)        |
| CC121          | ST121  | t3204    | 0               | 1 (1.2%)        |
|                |        | t159     | 0               | 1 (1.2%)        |
|                | ST1964 | t272     | 0               | 1 (1.2%)        |
|                | ST120  | t272     | 1 (3.2%)        | 0               |
|                | ST2160 | t159     | 0               | 1 (1.2%)        |
| CC772          | ST772  | t657     | 5 (16.1%)       | 1 (1.2%)        |
|                |        | t1839    | 0               | 1 (1.2%)        |
|                |        | t345     | 3 (9.6%)        | 1 (1.2%)        |
|                | ST1    | t177     | 0               | 1 (1.2%)        |
|                |        | t386     | 0               | 1 (1.2%)        |
|                |        | t098     | 0               | 1 (1.2%)        |
|                |        | t127     | 0               | 6 (7.7%)        |
|                |        | t693     | 0               | 1 (1.2%)        |
|                |        | t128     | 0               | 1 (1.2%)        |
|                |        | t8078    | 0               | 1 (1.2%)        |
|                |        | t948     | 0               | 2 (2.5%)        |
| Unknown        | t657   | 1 (3.2%) | 0               |                 |
| CC813          | ST813  | t10579   | 0               | 1 (1.2%)        |
|                | ST291  | t1149    | 0               | 1 (1.2%)        |
| CC239          | ST239  | t037     | 9 (29%)         | 0               |
|                |        | t2952    | 1 (3.2%)        | 0               |
|                | ST241  | t037     | 1 (3.2%)        | 0               |
| CC2884         | ST2884 | t4104    | 0               | 1 (1.2%)        |
|                | ST88   | t448     | 0               | 1 (1.2%)        |
|                |        | t5562    | 0               | 1 (1.2%)        |
|                |        | t2526    | 1 (3.2%)        | 0               |
| CC22           | ST22   | t005     | 1 (3.2%)        | 0               |

|              |         |         |          |           |
|--------------|---------|---------|----------|-----------|
|              |         | t845    | 1 (3.2%) | 0         |
|              |         | t091    | 1 (3.2%) | 0         |
|              |         | Unknown | 1 (3.2%) | 0         |
|              |         | t309    | 1 (3.2%) | 0         |
|              |         | t310    | 0        | 1 (1.2%)  |
|              |         | t948    | 0        | 1 (1.2%)  |
|              | ST1414  | t1328   | 1 (3.2%) | 0         |
| CC5          | ST5     | t442    | 1 (3.2%) | 9 (11.6%) |
|              |         | t14912  | 0        | 1 (1.2%)  |
|              |         | t8179   | 0        | 1 (1.2%)  |
|              |         | t010    | 0        | 1 (1.2%)  |
|              | ST83    | t442    | 0        | 1 (1.2%)  |
| Singleton 1  | ST580   | t14911  | 0        | 1 (1.2%)  |
| Singleton 2  | ST45    | t302    | 0        | 1 (1.2%)  |
| Singleton 3  | Unknown | t021    | 0        | 1 (1.2%)  |
| Singleton 4  | ST2642  | t064    | 1 (3.2%) | 0         |
| Singleton 5  | ST72    | t148    | 0        | 2 (2.5%)  |
| Singleton 6  | ST789   | t091    | 0        | 2 (2.5%)  |
|              |         | t2505   | 0        | 2 (2.5%)  |
| Singleton 7  | ST6     | t657    | 0        | 1 (1.2%)  |
|              |         | t4285   | 0        | 1 (1.2%)  |
|              |         | t12406  | 0        | 1 (1.2%)  |
| Singleton 8  | ST15    | t084    | 0        | 1 (1.2%)  |
| Singleton 9  | ST2885  | t15579  | 0        | 1 (1.2%)  |
| Singleton 10 | ST672   | t3841   | 0        | 5 (6.4%)  |
|              |         | t1309   | 0        | 4 (5.1%)  |
| Singleton 11 | ST2233  | t2663   | 0        | 9 (11.6%) |

CC: Clonal complex; ST: Sequence type; MRSA: Methicillin-resistant *Staphylococcus aureus*; MSSA: Methicillin-sensitive *Staphylococcus aureus*.

TABLE S3. Distribution of *ica* genes in relation to *agr* types, SCC*mec* types and MLST of *Staphylococcus aureus* strains.

| Genetic characteristics   | No. (%) of isolates positive for genes encoding for |             |
|---------------------------|-----------------------------------------------------|-------------|
|                           | <i>icaA</i>                                         | <i>icaD</i> |
| <b><i>agr</i> group</b>   |                                                     |             |
| <i>Agr I</i>              | 35                                                  | 36          |
| <i>Agr II</i>             | 17                                                  | 16          |
| <i>Agr III</i>            | 28                                                  | 32          |
| <i>Agr IV</i>             | 6                                                   | 6           |
| NT                        | 8                                                   | 10          |
| <b>SCC<i>mec</i> type</b> |                                                     |             |
| III                       | 2                                                   | 2           |
| IV                        | 6                                                   | 6           |
| V                         | 13                                                  | 14          |
| UT6                       | 8                                                   | 6           |
| <b>MLST</b>               |                                                     |             |
| ST772                     | 11                                                  | 12          |
| ST239                     | 9                                                   | 7           |
| ST88                      | 2                                                   | 3           |
| ST5                       | 12                                                  | 13          |
| ST22                      | 5                                                   | 5           |
| ST1482                    | 1                                                   | 1           |
| ST2233                    | 7                                                   | 9           |
| ST1                       | 14                                                  | 14          |
| ST120                     | 0                                                   | 0           |
| ST121                     | 2                                                   | 2           |
| ST672                     | 8                                                   | 8           |
| ST789                     | 3                                                   | 3           |
| ST813                     | 1                                                   | 1           |
| ST291                     | 1                                                   | 1           |
| ST72                      | 0                                                   | 2           |
| ST2885                    | 1                                                   | 1           |
| ST2884                    | 1                                                   | 1           |
| ST45                      | 1                                                   | 1           |

|        |       |       |
|--------|-------|-------|
| ST243  | 1     | 1     |
| NK     | 0 (2) | 0 (2) |
| ST2642 | 1     | 1     |
| ST83   | 1     | 1     |
| ST580  | 0     | 1     |
| ST714  | 1     | 1     |
| ST938  | 2     | 2     |
| ST15   | 1     | 1     |
| ST1964 | 1     | 1     |
| ST2160 | 1     | 1     |
| ST503  | 1     | 1     |
| ST1414 | 1     | 1     |
| ST6    | 2     | 3     |
| ST241  | 1     | Nil   |

agr: accessory gene regulator; SCC: staphylococcal cassette chromosome; MLST: Multi-locus sequence typing; ST: Sequence type; NT: not typeable; UT: untypeable; NK: Unknown
